# Supplementary material for: Rapid vapour deposition and in situ melt crystallization for 1 min fabrication of 10 μm-thick crystalline silicon films with a lateral grain size of over 100 μm
Source: Royal Society of Chemistry journal article supplement (doi:10.1039/c6ce00122j), 2016-01-01
Supplement: c6ce00122j1.pdf [file c6ce00122j1.pdf]

***Supporting information for***

**Rapid vapour deposition and in situ melt crystallization for 1-min fabrication of 10- $\mu$ m-thick crystalline silicon films with a lateral grain size of over 100  $\mu$ m**

Y. Yamasaki, K. Hasegawa, T. Osawa and S. Noda\*

Department of Applied Chemistry, Waseda University, 3-4-1 Okubo, Shinjuku-ku, Tokyo 169-8555, Japan

E-mail: [noda@waseda.jp](mailto:noda@waseda.jp)

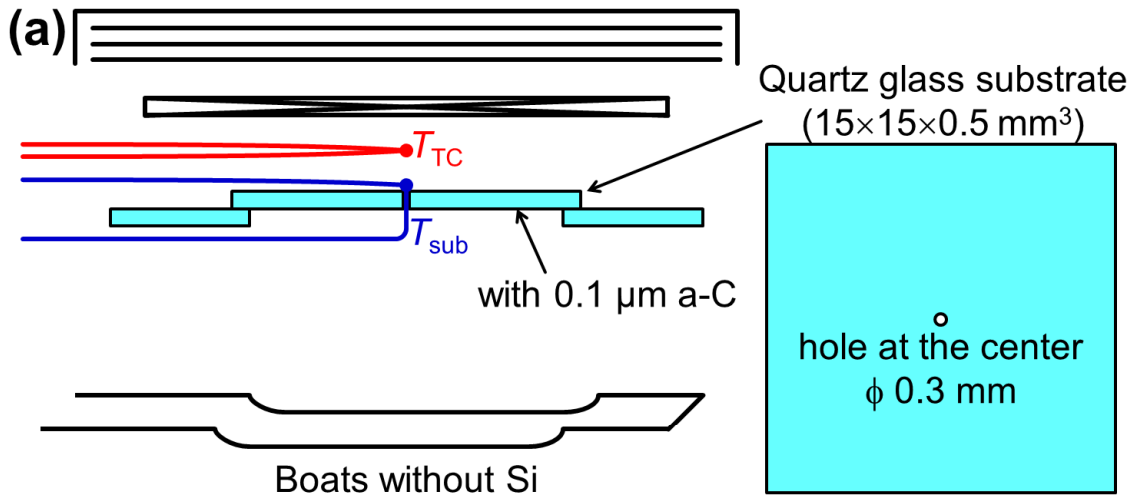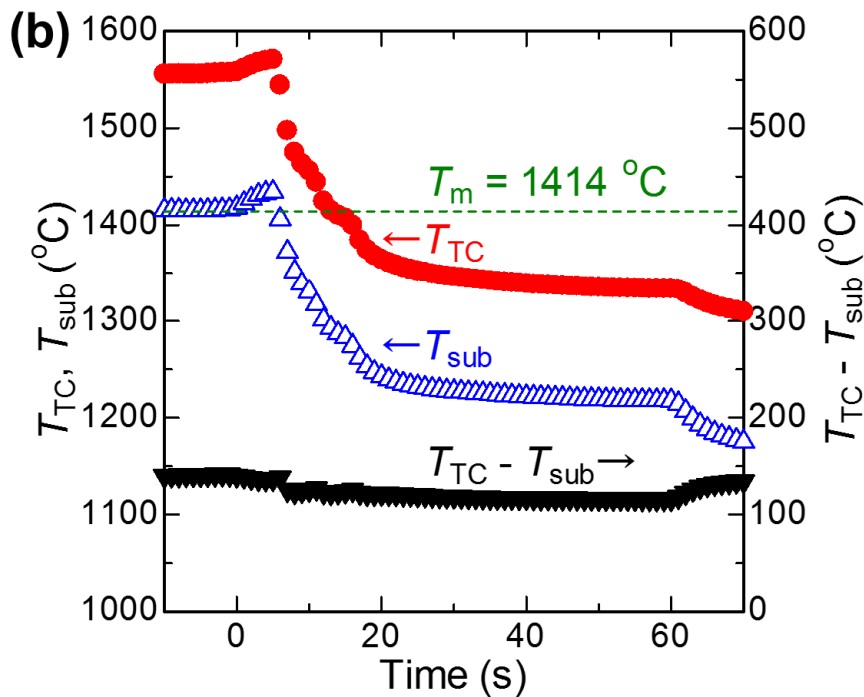

**Fig. S1** Temperature measurement of the substrate during the RVD process. Measurement was done with the same time profile of input powers for the tungsten boats and the carbon heater as the standard Si deposition method (Fig. 3) but without putting the Si source material in the boats. Quartz glass substrate with 0.1 μm-thick a-C layer was used (the same substrate structure as Fig. 3), and a Pt-Pt<sub>0.87</sub>Rh<sub>0.13</sub> thermocouple was attached to the substrate through a φ=0.3 mm hole made at the centre of the substrate. The substrate temperature ( $T_{sub}$ ) proved to be 100–150 °C lower than the upper W<sub>0.95</sub>Re<sub>0.05</sub>-W<sub>0.74</sub>Re<sub>0.26</sub> thermocouple temperature ( $T_{TC}$ ), and slightly above the melting point of Si ( $T_m = 1414$  °C) when starting the RVD process. And  $T_{sub}$  decreased below  $T_m$  by decreasing the heating power for the upper carbon heater at 5 s.

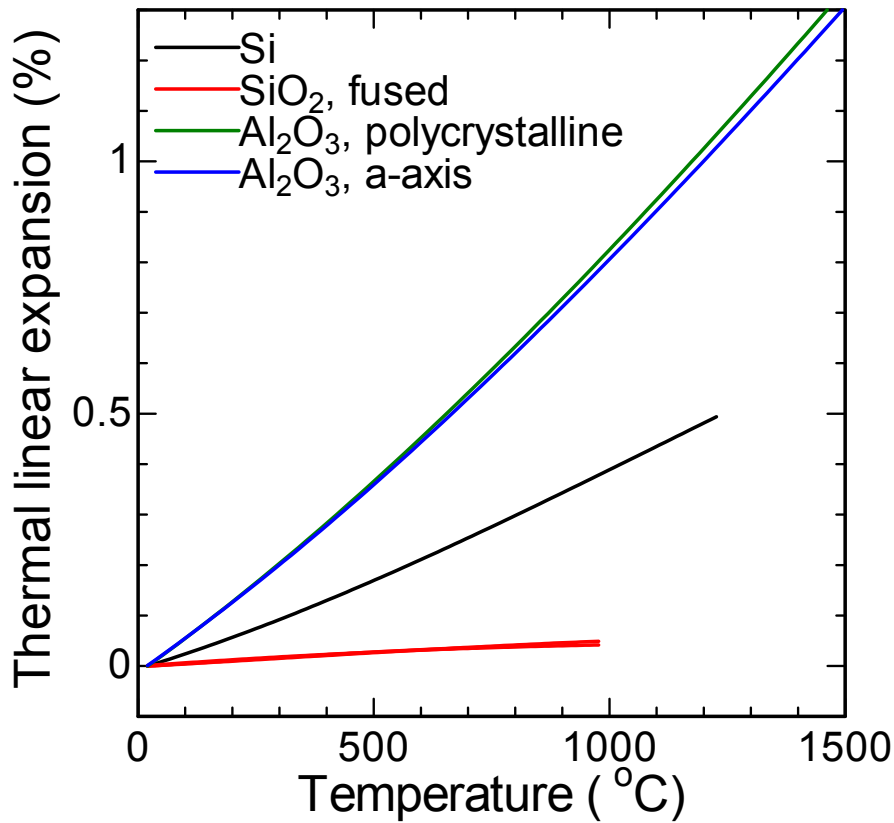

**Fig. S2** Thermal linear expansion of Si, SiO<sub>2</sub>, and Al<sub>2</sub>O<sub>3</sub>, calculated using the equations recommended by Touloukian, et al.<sup>26</sup> The expansions (%) are:

$$\text{Si:} \quad -0.071 + 1.887 \times 10^{-4}(T+273) + 1.934 \times 10^{-7}(T+273)^2 - 4.544 \times 10^{-11}(T+273)^3$$

$$\text{SiO}_2, \text{ fused:} \quad -0.014 + 4.028 \times 10^{-5}(T+273) + 2.733 \times 10^{-8}(T+273)^2 - 1.541 \times 10^{-11}(T+273)^3$$

$$-0.022 + 8.728 \times 10^{-5}(T+273) - 3.200 \times 10^{-8}(T+273)^2 + 2.347 \times 10^{-12}(T+273)^3$$

$$-0.015 + 3.968 \times 10^{-5}(T+273) + 4.666 \times 10^{-8}(T+273)^2 - 3.446 \times 10^{-11}(T+273)^3$$

$$\text{Al}_2\text{O}_3, \text{ poly:} \quad -0.180 + 5.494 \times 10^{-4}(T+273) + 2.252 \times 10^{-7}(T+273)^2 - 2.894 \times 10^{-11}(T+273)^3$$

$$\text{Al}_2\text{O}_3, \text{ a-axis:} \quad -0.176 + 5.431 \times 10^{-4}(T+273) + 2.150 \times 10^{-7}(T+273)^2 - 2.810 \times 10^{-11}(T+273)^3$$

where  $T$  is temperature (°C).

26. Y. S. Touloukian, R.K. Kirby, R.E. Taylor and T.Y.R. Lee, *Thermophysical Properties of Matter*

- *The TPRC Data Series. Volume 13. Thermal Expansion - Nonmetallic Solids*, IFI Plenum,

New York, 1977, p. 154, p. 176, and p. 358.
